# Supplementary material for: Biological Degradation of Aflatoxin B1 by Cell-Free Extracts of Bacillus velezensis DY3108 with Broad PH Stability and Excellent Thermostability
Source: PubMed Central journal article supplement (PMC6116002; doi:10.3390/toxins10080330), 2018-08-14
Supplement: toxins-10-00330-s001.pdf [file toxins-10-00330-s001.pdf]

## Supplementary Materials: Biological Degradation of Aflatoxin B<sub>1</sub> by Cell-Free Extracts of *Bacillus velezensis* DY3108 with Broad PH Stability and Excellent Thermostability

Xian Shu, Yuting Wang, Qing Zhou, Minghao Li, Hao Hu, Yuhan Ma, Xue Chen, Jun Ni, Weiwei Zhao, Shengwei Huang and Lifang Wu

**Table S1.** Physiological and biochemical characteristic of the bacterial isolate DY3108.

| Characteristic    | Result       | Characteristic           | Result |
|-------------------|--------------|--------------------------|--------|
| Gram-staining     | +            | Assimilation of          |        |
| Pigmentation      | Creamy white | Glycogen                 | +      |
| Oxidase           |              | Lactose                  | +      |
| Motility          | +            | Melibiose                | -      |
| Oxidase           | +            | D-fructose               | +      |
| Catalase          | +            | D-Raffinose              | +      |
| V-P test          | +            | D-arabitol               | +      |
| Indole test       | -            | Mannitol                 | +      |
| Nitrate reduction | +            | inositol                 | +      |
| Urease            | -            | D-xylose                 | +      |
| Hydrolysis of     |              | $\beta$ -methyl-xyloside | +      |
| casein            | +            | Growth in 5% NaCl        | +      |
| Gelatin           | +            | Growth in 10% NaCl       | +      |
| Growth at 5°C     | -            |                          |        |
| Growth at 42°C    | +            |                          |        |
